# Supplementary material for: Perceptions of Digital Health Education Among European Medical Students: Mixed Methods Survey
Source: PubMed Central journal article supplement (PMC7455864; doi:10.2196/19827), 2020-08-14

**Suppl. figure 1:** Flow chart of the participation in the survey

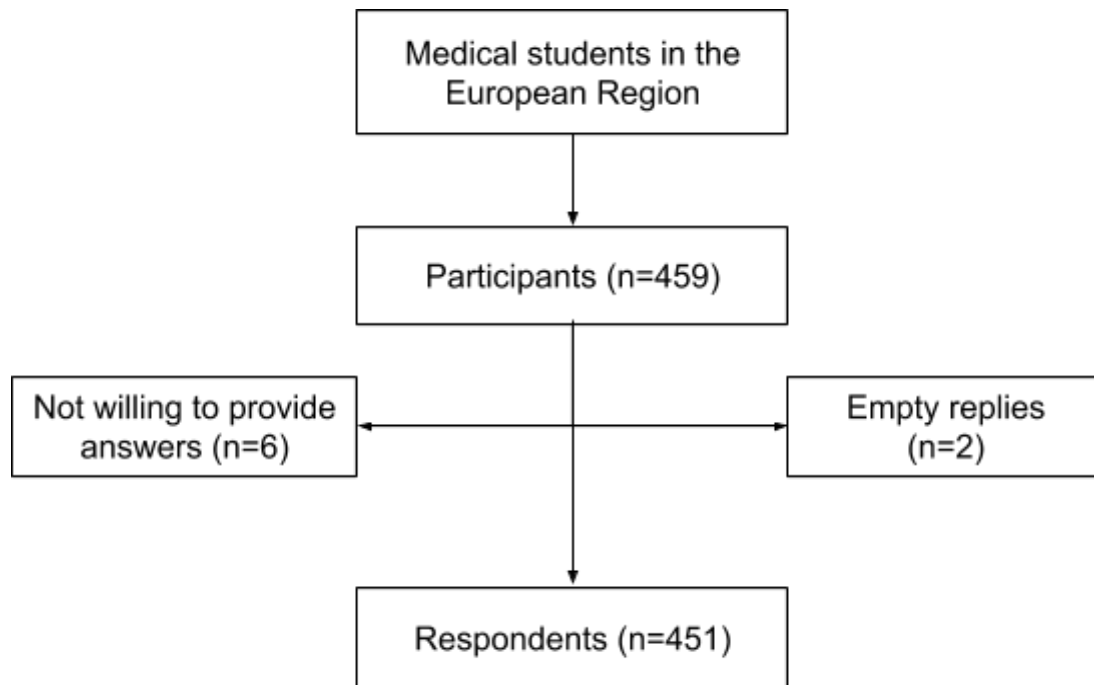

**Suppl. figure 2:** Overview of year of medical studies of respondents

Please select the year of medical studies:

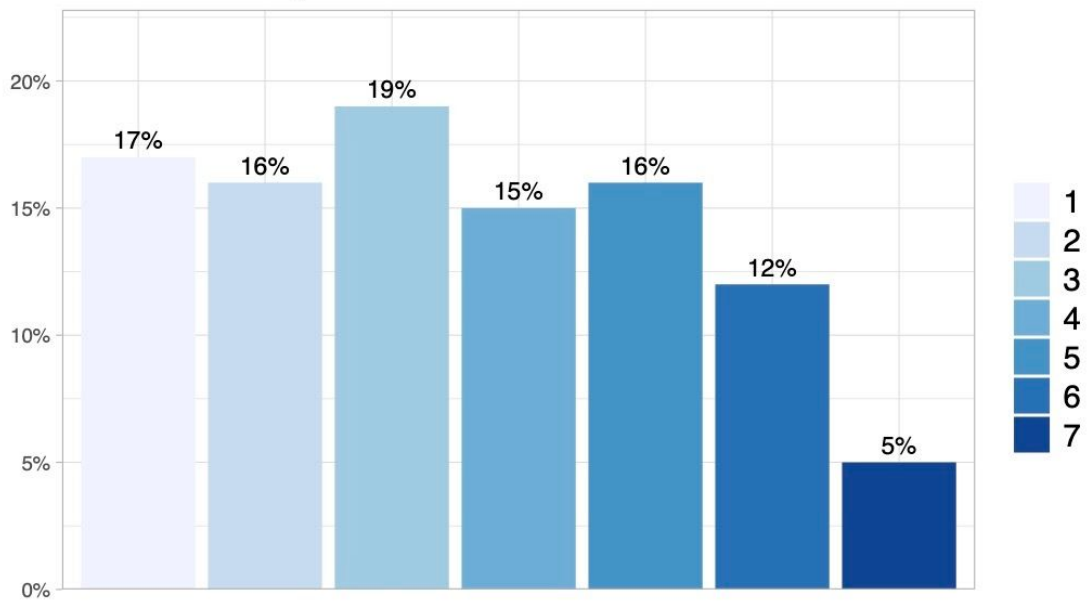

**Suppl. figure 3:** Geographical distribution of respondents. Countries covered: Albania, Austria, Belgium, Bulgaria, Cyprus, Czech Republic, Denmark, Estonia, Finland, France, Georgia, Germany, Greece, Hungary, Ireland, Italy, Kosovo, Latvia, Lithuania, Luxembourg, Malta, Moldova, Montenegro, Netherlands, Norway, Poland, Portugal, Romania, Russian Federation, Slovakia, Slovenia, Spain, Sweden, Switzerland, the former Yugoslav Republic of Macedonia, Turkey, Ukraine, United Kingdom.

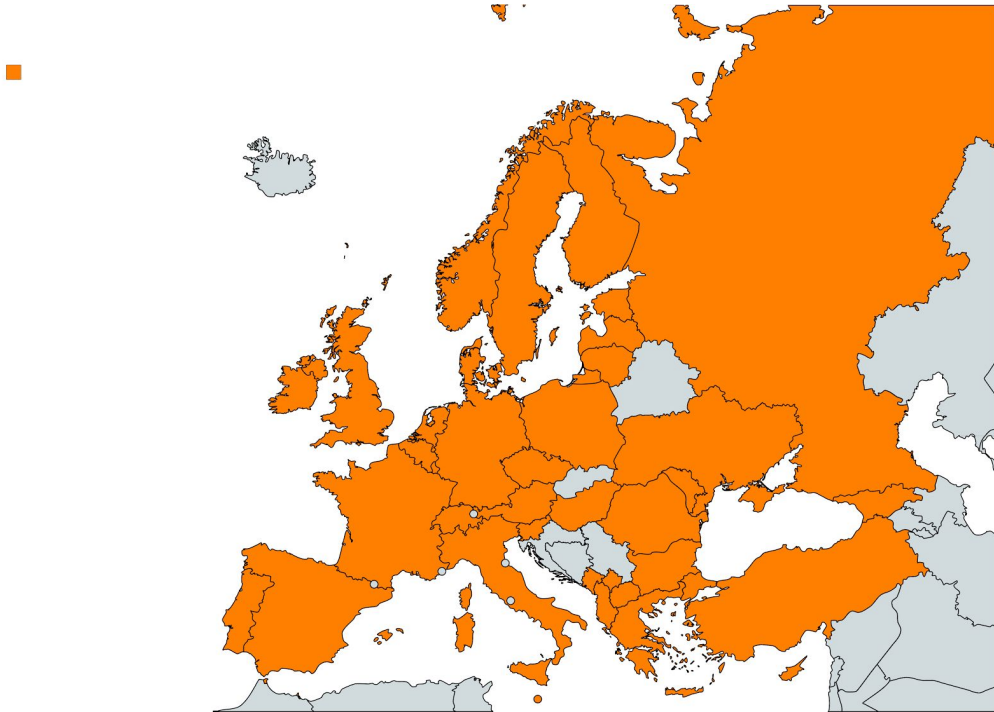

**Suppl. figure 4:** Attitude of medical students towards mHealth

In the future use of mHealth, I see...

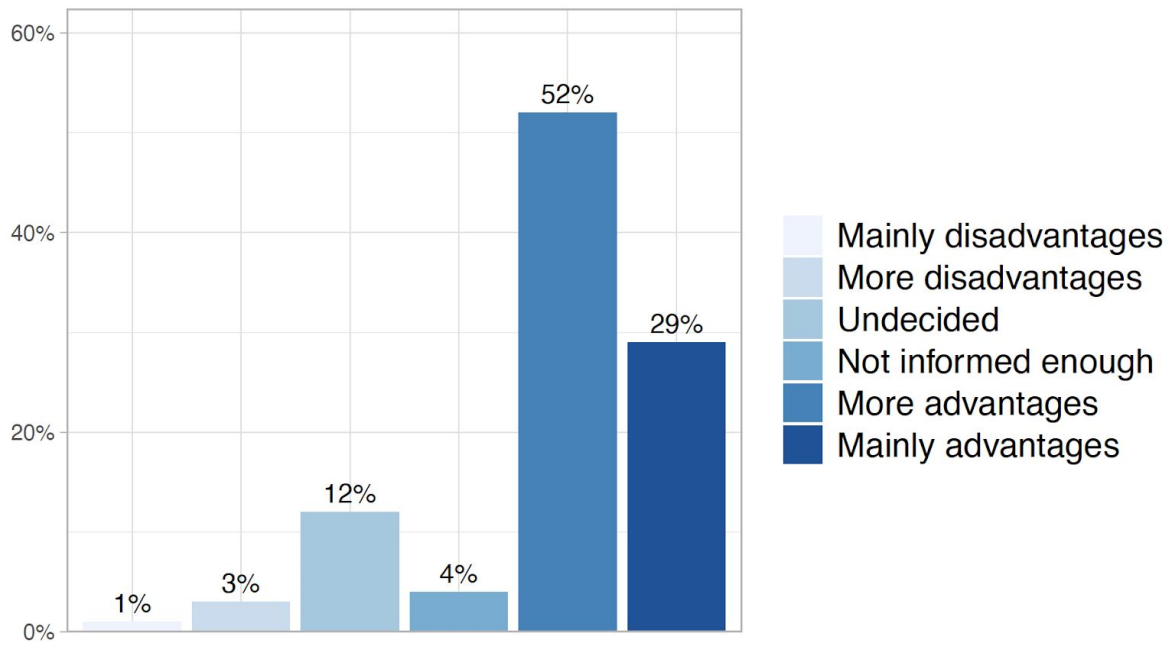

**Suppl. figure 5:** Attitude of medical students towards teleHealth

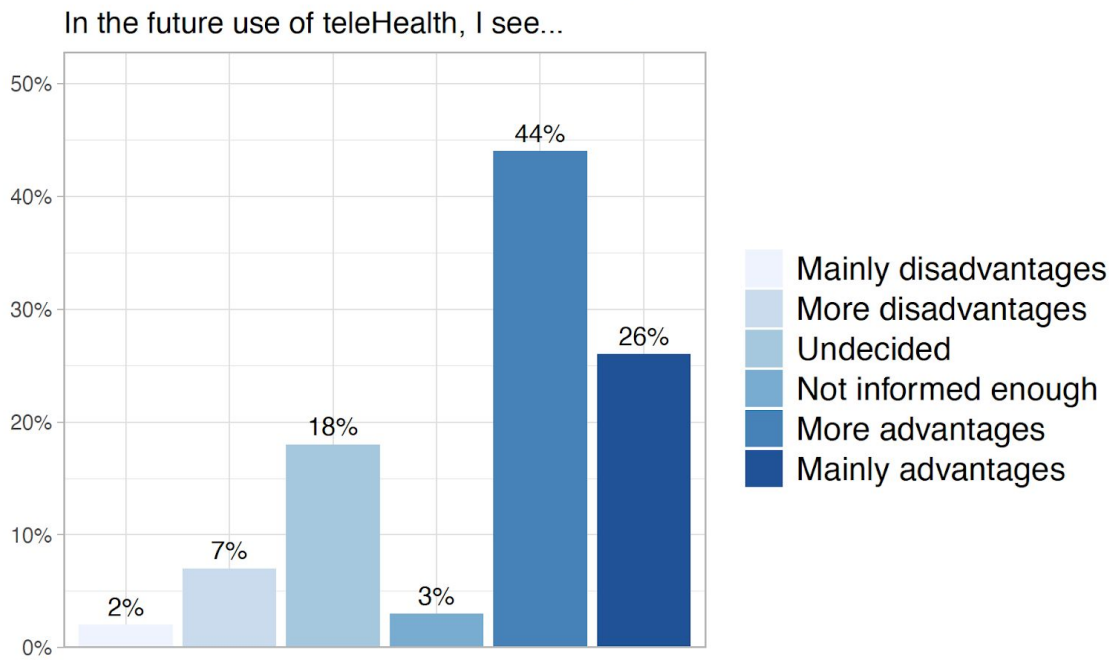

**Suppl. figure 6:** Attitude of medical students towards big data

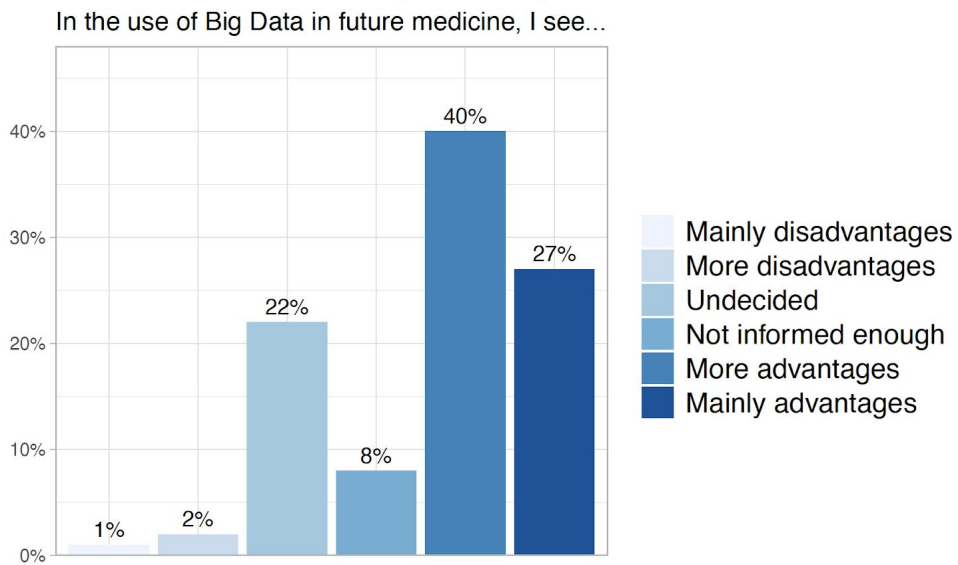

Supplement: jmir_v22i8e19827_app6.pdf [file jmir_v22i8e19827_app6.pdf]
